# Supplementary material for: An elevated triglyceride-glucose index in the first-trimester predicts adverse pregnancy outcomes: a retrospective cohort study
Source: Springer Nature journal article supplement (doi:10.1007/s00404-025-07973-0), 2025-02-26

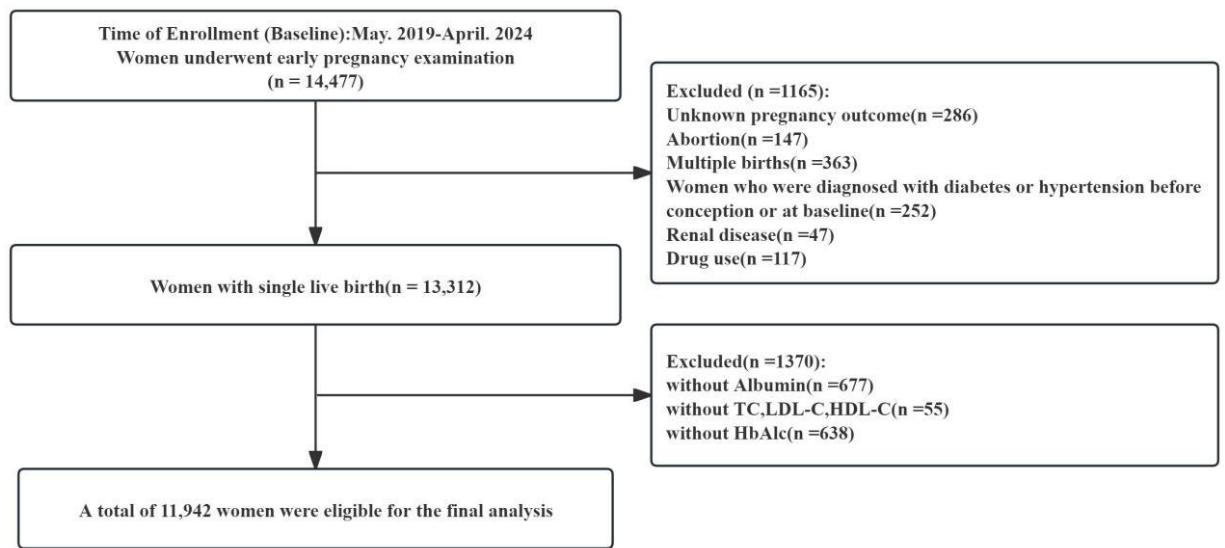

Supplement: MOESM1 [file 404_2025_7973_MOESM1_ESM.pdf]
